# Supplementary material for: Using Age-Stage Two-Sex Life Tables to Assess the Suitability of Three Solanaceous Host Plants for the Invasive Cotton Mealybug Phenacoccus solenopsis Tinsley
Source: MDPI journal article supplement (doi:10.3390/plants13101381), 2024-05-16
Supplement: s1 [file s1]

# Using age-stage two-sex life tables to assess the suitability of three Solanaceous host plants for the invasive cotton mealybug *Phenacoccus solenopsis* Tinsley

Khaled Abbes, Ahlem Harbi, Emilio Guerrieri and Brahim Chermiti

We calculated age-stage specific survival rate ( $s_{xj}$ : the probability that a newly laid egg will survive to age  $x$  and stage  $j$ ), age-stage specific fecundity ( $f_{xj}$ : the mean fecundity of females at age  $x$ ), age-specific survival rate ( $l_x$ : the probability that a newly laid egg will survive to age  $x$ ), and age-specific fecundity ( $m_x$ : the mean fecundity of individuals at age  $x$ ). In the age-stage two-sex life table,  $l_x$  and  $m_x$  are calculated as [27-28]:

$$l_x = \sum_{j=1}^k s_{xj} \quad (S1)$$

$$m_x = \frac{\sum_{j=1}^k s_{xj} f_{xj}}{\sum_{j=1}^k s_{xj}} \quad (S2)$$

where  $k$  is the last stage of the study cohort. The net reproductive rate ( $R_0$ ) represents the total number of offspring that an individual can produce during its lifetime and is calculated as [27-28]:

$$R_0 = \sum_{x=0}^{\infty} l_x m_x \quad (S3)$$

The intrinsic rate of increase ( $r$ ) is estimated by using the iterative bisection method from the Euler-Lotka equation with age indexed from zero as follows [27-28]:

$$r = \sum_{x=0}^{\infty} e^{-r(x+1)} l_x m_x = 1 \quad (S4)$$

The finite rate of increase ( $\lambda$ ) is calculated as follows [51]:

$$\lambda = e^r \quad (S5)$$

The mean generation time ( $T$ ) is defined as the time that a population requires to increase to the  $R_0$ -fold of its size at the stable age-stage distribution, and is calculated as follows [51]:

$$T = \frac{\ln R_0}{r} \quad (\text{S6})$$

Age-stage life expectancy ( $e_{xj}$ ) is the time that an individual of age  $x$  and stage  $j$  is expected to live and was calculated according to the method described by [52] as:

$$e_{xj} = \sum_{i=x}^{\infty} \sum_{j=y}^k s'_{iy} \quad (\text{S7})$$

where  $n$  is the number of age groups,  $m$  is the number of stages, and  $s'_{ij}$  is the probability that an individual of age  $x$  and stage  $j$  will survive to age  $i$  and stage  $y$ .

The age-stage reproductive value ( $v_{xj}$ ) is defined as the contribution of individuals of age  $x$  and stage  $j$  to the future population. In the age-stage two-sex life table, it is calculated as [53-55]:

$$V_{xj} = \frac{e^{r(x+1)}}{s_{xj}} \sum_{i=x}^{\infty} e^{-r(i+1)} \sum_{j=y}^k s'_{iy} f_{iy} \quad (\text{S8})$$
